# Supplementary material for: Psychological and Physical Changes Caused by COVID-19 Pandemic in Elementary and Junior High School Teachers: A Cross-Sectional Study
Source: MDPI journal article supplement (doi:10.3390/ijerph19137568), 2022-06-21
Supplement: s1 [file s1]

| COVID-19 questionnaire survey                                                                                                                                                                             |                                                     |          |            |              |
|-----------------------------------------------------------------------------------------------------------------------------------------------------------------------------------------------------------|-----------------------------------------------------|----------|------------|--------------|
| School Type <input type="checkbox"/> Elementary School <input type="checkbox"/> Junior high school<br>Sex <input type="checkbox"/> Male <input type="checkbox"/> Female<br>Age                      _____ |                                                     |          |            |              |
| A question about changes in subjective symptoms before and after the COVID-19 pandemic. Please circle the relevant part.                                                                                  |                                                     |          |            |              |
| Do you have changes in psychological conditions before and after school closures due to COVID-19 ?                                                                                                        |                                                     | Improved | No Changed | Deteriorated |
| Q1-1                                                                                                                                                                                                      | Feeling high                                        |          |            |              |
| Q1-2                                                                                                                                                                                                      | Irritation                                          |          |            |              |
| Q1-3                                                                                                                                                                                                      | Anger                                               |          |            |              |
| Q1-4                                                                                                                                                                                                      | Indignation                                         |          |            |              |
| Q1-5                                                                                                                                                                                                      | Anxiety                                             |          |            |              |
| Q1-6                                                                                                                                                                                                      | Chagrin                                             |          |            |              |
| Q1-7                                                                                                                                                                                                      | Impotent feeling                                    |          |            |              |
| Q1-8                                                                                                                                                                                                      | Depression                                          |          |            |              |
| Q1-9                                                                                                                                                                                                      | No sense of reality                                 |          |            |              |
| Q1-10                                                                                                                                                                                                     | No sense of time                                    |          |            |              |
| Q1-11                                                                                                                                                                                                     | Emotions are paralyzed                              |          |            |              |
| Q1-12                                                                                                                                                                                                     | I cannot concentrate on work at all                 |          |            |              |
| Q1-13                                                                                                                                                                                                     | No longer wanting to engage with others             |          |            |              |
| Do you have changes in physical symptoms before and after school closures due to COVID-19 ?                                                                                                               |                                                     | Improved | No Changed | Deteriorated |
| Q2-1                                                                                                                                                                                                      | Insomnia/nightmares                                 |          |            |              |
| Q2-2                                                                                                                                                                                                      | Palpitations                                        |          |            |              |
| Q2-3                                                                                                                                                                                                      | Standing dizziness                                  |          |            |              |
| Q2-4                                                                                                                                                                                                      | Sweating                                            |          |            |              |
| Q2-5                                                                                                                                                                                                      | Dyspnea                                             |          |            |              |
| Q2-6                                                                                                                                                                                                      | Digestive symptoms                                  |          |            |              |
| Did COVID-19 impact your work?                                                                                                                                                                            |                                                     | Improved | No Changed | Deteriorated |
| Q3-1                                                                                                                                                                                                      | Excessively immersed in the work                    |          |            |              |
| Q3-2                                                                                                                                                                                                      | Lowering of the thinking ability                    |          |            |              |
| Q3-3                                                                                                                                                                                                      | Lowering of the concentration ability               |          |            |              |
| Q3-4                                                                                                                                                                                                      | Lowering of the work efficiency                     |          |            |              |
| What is your stress causes for teachers associated with COVID-19 infection control ? Please make circle all that apply.                                                                                   |                                                     |          |            |              |
| Q4-1                                                                                                                                                                                                      | Always wearing mask                                 |          |            |              |
| Q4-2                                                                                                                                                                                                      | Body temperature and health status grasping         |          |            |              |
| Q4-3                                                                                                                                                                                                      | Disinfection work by teachers                       |          |            |              |
| Q4-4                                                                                                                                                                                                      | Social distance                                     |          |            |              |
| Q4-5                                                                                                                                                                                                      | Activity restriction during class                   |          |            |              |
| Q4-6                                                                                                                                                                                                      | Using face shield                                   |          |            |              |
| Q4-7                                                                                                                                                                                                      | Prohibition or restriction of play and conversation |          |            |              |
| Q4-8                                                                                                                                                                                                      | Eat without talking /no refills                     |          |            |              |
| Q4-9                                                                                                                                                                                                      | Do not let children serve                           |          |            |              |
